# Supplementary material for: Revealing the trehalose mediated inhibition of protein aggregation through lysozyme–silver nanoparticle interaction
Source: Royal Society of Chemistry journal article supplement (doi:10.1039/c5sm01896j), 2015-01-01
Supplement: c5sm01896j1.pdf [file c5sm01896j1.pdf]

## Electronic supplementary information

### Illuminating trehalose mediated inhibition of protein aggregation through lysozyme-silver nanoparticle interaction

Soumik Siddhanta,<sup>a,#</sup> Ishan Barman<sup>b,c\*</sup> and Chandrabhas Narayana<sup>a\*</sup>

a) Light Scattering Laboratory, Chemistry & Physics of Materials Unit, Jawaharlal Nehru Centre for Advanced Scientific Research, Jakkur P.O., Bangalore 560 064, India .E-mail: cbhas@jncasr.ac.in

b) Department of Mechanical Engineering, Johns Hopkins University, Baltimore, Maryland 21218, USA. E-mail: ibarman@jhu.edu

c) Department of Oncology, Johns Hopkins University School of Medicine, Baltimore, Maryland 21287, USA.

# Author's present address

\* Corresponding authors

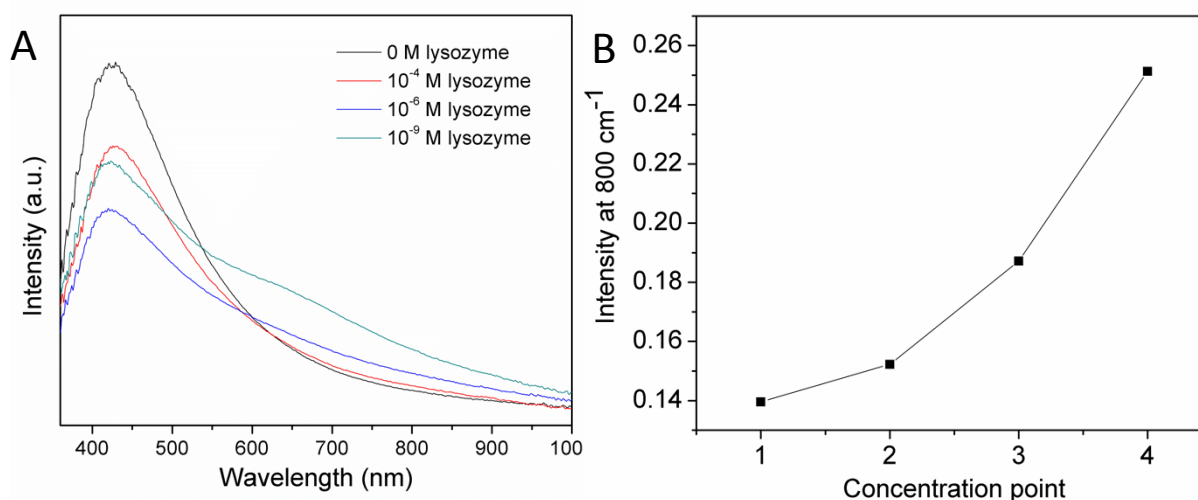

**Figure S1** (A) UV-vis spectra of Ag nanoparticles in presence of different concentrations of lysozyme. (B) The intensity of longitudinal plasmon band at 800 cm<sup>-1</sup> at different concentration points (1-4) of lysozyme which are 0, 10<sup>-4</sup>, 10<sup>-6</sup> and 10<sup>-9</sup> M respectively.

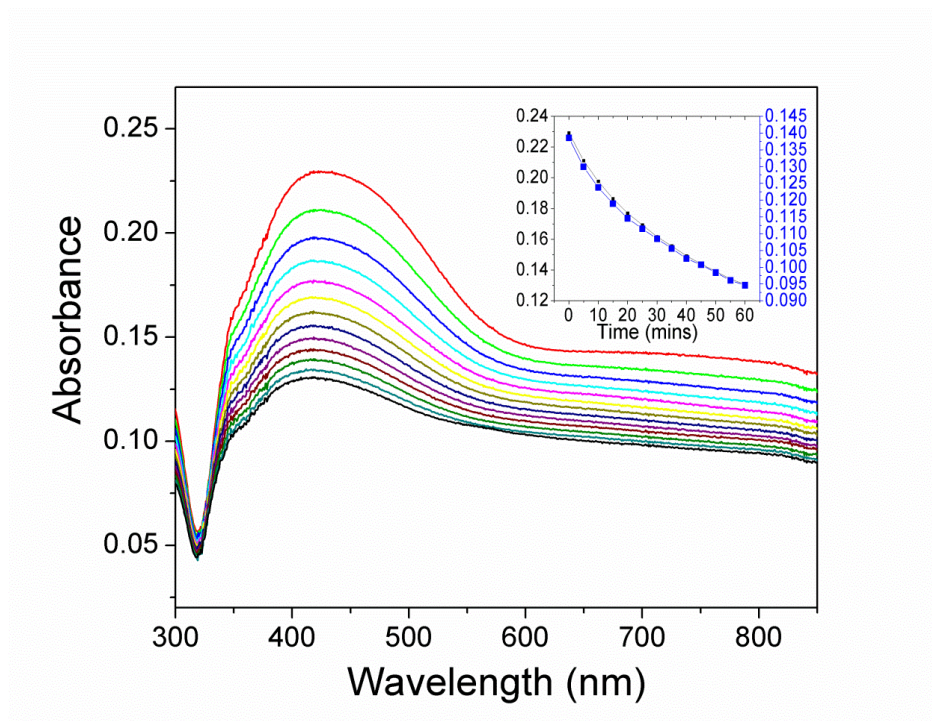

**Figure S2** UV-vis spectra of Ag nanoparticles in presence of 1 M NaCl with intervals of 5 mins between successive spectra. Inset shows the intensity variation of 450 nm and 800 nm peaks.
